# Supplementary figures and images for: Genome-Wide Association Studies in Sunflower: Towards Sclerotinia sclerotiorum and Diaporthe/Phomopsis Resistance Breeding
Source: MDPI journal article supplement (doi:10.3390/genes13122357), 2022-12-14

a)

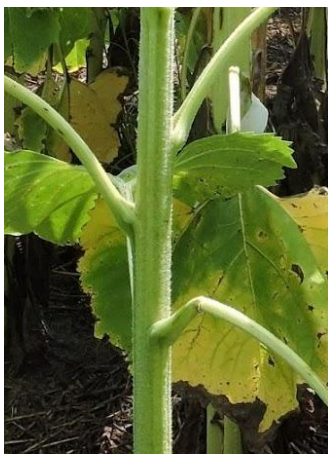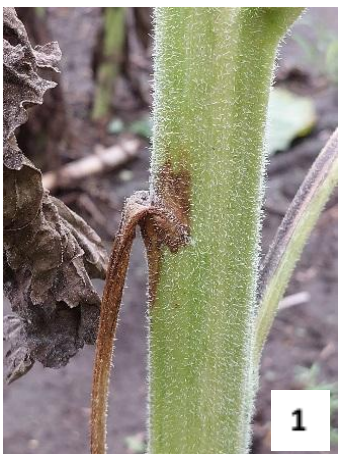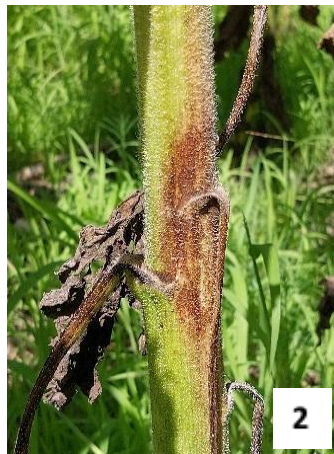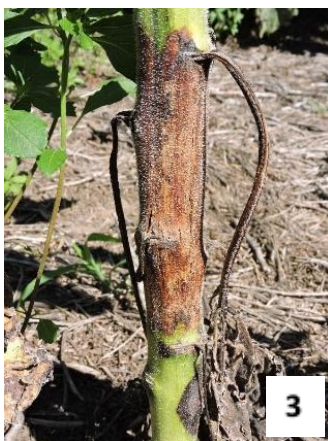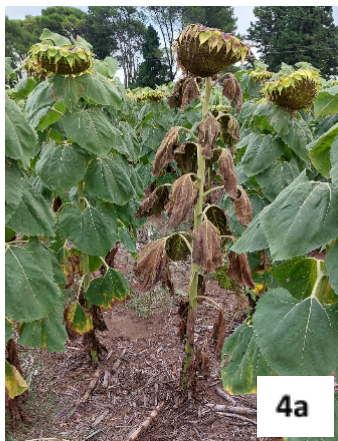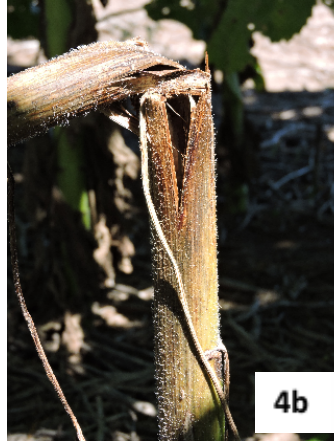

b)

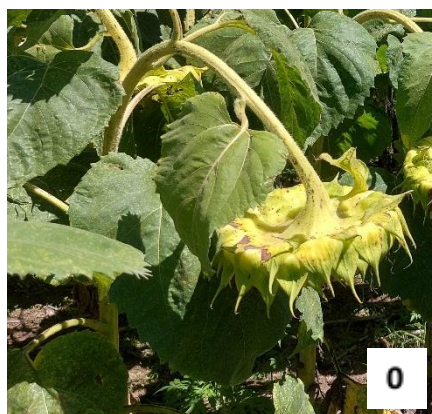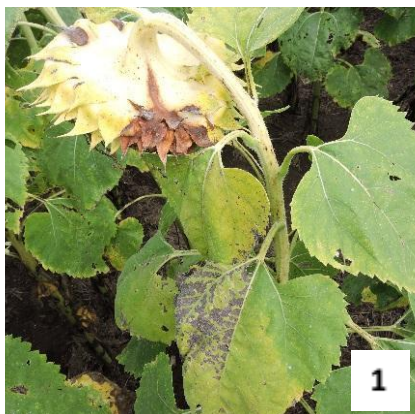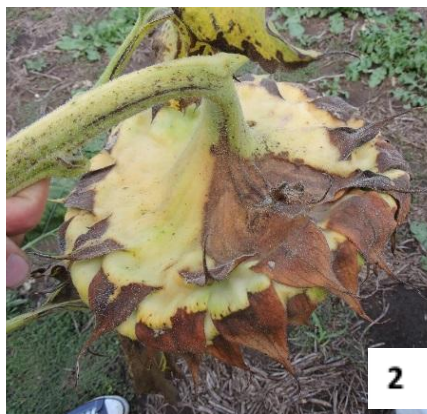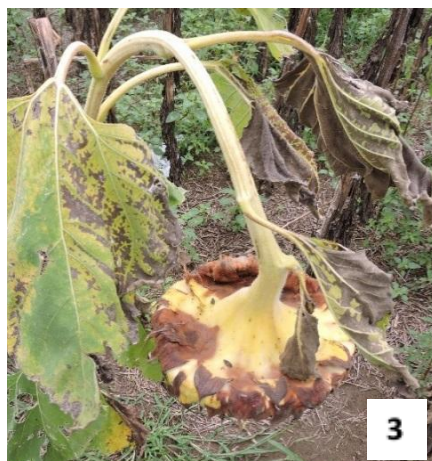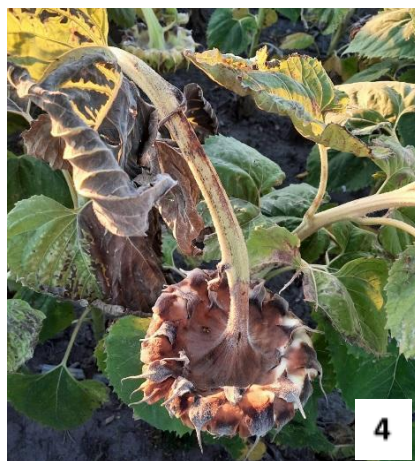

Supplement: s1 [file s1]
